# Supplementary material for: Adolescent Cardiorespiratory Fitness and Risk of Cancer in Late Adulthood: Nationwide Sibling-Controlled Cohort Study
Source: PubMed Central journal article supplement (PMC11245056; doi:10.1101/2024.07.01.24309761), 2024-07-03
Supplement: media-1.pdf [file media-1.pdf]

## Supplemental material

### Adolescent Cardiorespiratory Fitness and Risk of Cancer in Late Adulthood: Nationwide Sibling-Controlled Cohort Study

Marcel Ballin, associated researcher<sup>1,2,a</sup>, Daniel Berglind, associate professor<sup>2,3,4</sup>, Pontus Henriksson, associate professor<sup>5</sup>, Martin Neovius, professor<sup>6</sup>, Anna Nordström, researcher<sup>7,8</sup>, Francisco B. Ortega, professor<sup>9,10</sup>, Elina Sillanpää, associate professor<sup>10,11</sup>, Peter Nordström, professor<sup>1,b</sup>, Viktor H. Ahlqvist, postdoctoral researcher<sup>1,12,13,a,b</sup>

<sup>1</sup>Department of Public Health and Caring Sciences, Clinical Geriatrics, Uppsala University, Uppsala, Sweden.

<sup>2</sup>Centre for Epidemiology and Community Medicine, Region Stockholm, Stockholm, Sweden.

<sup>3</sup>Department of Global Public Health, Karolinska Institutet, Stockholm, Sweden.

<sup>4</sup>Center for Wellbeing, Welfare and Happiness, Stockholm School of Economics, Stockholm, Sweden.

<sup>5</sup>Department of Health, Medicine and Caring Sciences, Linköping University, Linköping, Sweden.

<sup>6</sup>Department of Medicine, Clinical Epidemiology Division, Karolinska Institutet, Stockholm, Sweden.

<sup>7</sup>Department of Medical Sciences, Uppsala University, Uppsala, Sweden.

<sup>8</sup>School of Sports Science, UiT The Arctic University of Norway, Tromsø, Norway.

<sup>9</sup>Department of Physical Education and Sports, Faculty of Sport Sciences, Sport and Health University Research Institute (iMUDS), University of Granada; CIBEROBN, ISCIII, Granada, Andalucía, Spain.

<sup>10</sup>Faculty of Sport and Health Sciences, University of Jyväskylä, Jyväskylä, Finland.

<sup>11</sup>Wellbeing Services County of Central Finland, Jyväskylä, Finland.

<sup>12</sup>Department of Biomedicine, Aarhus University, Aarhus, Denmark.

<sup>13</sup>Institute of Environmental Medicine, Karolinska Institutet, Stockholm, Sweden.

<sup>a</sup>Dr. Ballin and Dr. Ahlqvist are joint corresponding authors.

<sup>b</sup>Prof. Nordström and Dr. Ahlqvist are joint senior authors.

**Supplementary table 1. Diagnostic codes used to define the outcomes in the study**

| <b>Cancer outcomes</b>             | <b>Code Type*</b> | <b>Codes</b>     |
|------------------------------------|-------------------|------------------|
| Head and neck                      | ICD-10            | C00-C14, C30-C32 |
|                                    | ICD-9             | 140-149          |
|                                    | ICD-8             | 140-149          |
| Oesophagus                         | ICD-10            | C15              |
|                                    | ICD-9             | 150              |
|                                    | ICD-8             | 150              |
| Lung                               | ICD-10            | C34              |
|                                    | ICD-9             | 162              |
|                                    | ICD-8             | 162              |
| Stomach                            | ICD-10            | C16              |
|                                    | ICD-9             | 151              |
|                                    | ICD-8             | 151              |
| Pancreas                           | ICD-10            | C25              |
|                                    | ICD-9             | 157              |
|                                    | ICD-8             | 157              |
| Liver, bile ducts, and gallbladder | ICD-10            | C22-C24          |
|                                    | ICD-9             | 155-156          |
|                                    | ICD-8             | 155-156          |
| Colon                              | ICD-10            | C18              |
|                                    | ICD-9             | 153              |
|                                    | ICD-8             | 153              |
| Rectum                             | ICD-10            | C19-C20          |
|                                    | ICD-9             | 154              |
|                                    | ICD-8             | 154              |
| Kidney                             | ICD-10            | C64              |
|                                    | ICD-9             | 189              |
|                                    | ICD-8             | 189              |
| Prostate                           | ICD-10            | C61              |
|                                    | ICD-9             | 185              |
|                                    | ICD-8             | 185              |
| Bladder                            | ICD-10            | C67              |
|                                    | ICD-9             | 188              |
|                                    | ICD-8             | 188              |
| Myeloma                            | ICD-10            | C90              |
|                                    | ICD-9             | 203              |
|                                    | ICD-8             | 203              |
| Melanoma skin                      | ICD-10            | C43              |
|                                    | ICD-9             | 172              |
|                                    | ICD-8             | 172              |
| Non-melanoma skin                  | ICD-10            | C44              |
|                                    | ICD-9             | 173              |
|                                    | ICD-8             | 173              |
| Overall cancer                     | ICD-10            | C00-C97          |
|                                    | ICD-9             | 140-175, 179-208 |
|                                    | ICD-8             | 140-209          |

ICD = International Classification of Diseases.

\*Codes from all versions (8,9,10) were available for the ascertainment of cancer mortality but codes from versions 8 and 9 were not available for the ascertainment of cancer diagnosis as we did not have access to those codes in the National Patient Register. However, we deem the number of such cases to have been very small given that most of the years of follow-up were covered using ICD-10. Moreover, ICD-8 and 9 are only available in inpatient care and are not validated to the same extent as ICD-10.

**Supplementary table 2. Follow-up time, number of events, and numbers censored in cohort and sibling analysis.**

| <b>Cancer outcome</b>                     | <b>Cohort analysis<br/>(N=1 124 049)</b> | <b>Sibling analysis<br/>(N=477 453)</b> |
|-------------------------------------------|------------------------------------------|-----------------------------------------|
| <b>Any cancer diagnosis</b>               |                                          |                                         |
| Follow-up time, median (range)            | 37.7 (0.1-51.4)                          | 38.3 (0.1-51.4)                         |
| Events                                    | 98 410 (8.8)                             | 41 293 (8.7)                            |
| Death from non-cancer causes              | 47 320 (4.2)                             | 18 579 (3.9)                            |
| Emigration                                | 75 786 (6.7)                             | 31 195 (6.5)                            |
| End of follow-up                          | 902 533 (80.3)                           | 386 386 (80.9)                          |
| <b>Any cancer mortality</b>               |                                          |                                         |
| Follow-up time, median (range)            | 38.3 (0.1-51.4)                          | 38.9 (0.1-51.4)                         |
| Events                                    | 16 789 (1.5)                             | 6908 (1.5)                              |
| Death from non-cancer causes              | 48 122 (4.3)                             | 18 912 (4.0)                            |
| Emigration                                | 76 274 (6.8)                             | 31 377 (6.6)                            |
| End of follow-up                          | 982 864 (87.4)                           | 420 256 (88.0)                          |
| <b>Head and neck</b>                      |                                          |                                         |
| Follow-up time, median (range)            | 38.3 (0.1-51.4)                          | 38.9 (0.1-51.4)                         |
| Events                                    | 4026 (0.4)                               | 1692 (0.4)                              |
| Death from other causes                   | 63 867 (5.7)                             | 25 385 (5.3)                            |
| Emigration                                | 76 251 (6.8)                             | 31 370 (6.6)                            |
| End of follow-up                          | 979 905 (87.2)                           | 419 006 (87.8)                          |
| <b>Oesophagus</b>                         |                                          |                                         |
| Follow-up time, median (range)            | 38.3 (0.1-51.4)                          | 38.9 (0.1-51.4)                         |
| Events                                    | 1178 (0.1)                               | 464 (0.1)                               |
| Death from other causes                   | 64 069 (5.7)                             | 25 494 (5.3)                            |
| Emigration                                | 76 274 (6.8)                             | 31 377 (6.6)                            |
| End of follow-up                          | 982 528 (87.4)                           | 420 118 (88.0)                          |
| <b>Lung</b>                               |                                          |                                         |
| Follow-up time, median (range)            | 38.3 (0.1-51.4)                          | 38.9 (0.1-51.4)                         |
| Events                                    | 3131 (0.3)                               | 1263 (0.3)                              |
| Death from other causes                   | 62 755 (5.6)                             | 24 971 (5.2)                            |
| Emigration                                | 76 270 (6.8)                             | 31 375 (6.6)                            |
| End of follow-up                          | 981 893 (87.4)                           | 419 844 (87.9)                          |
| <b>Stomach</b>                            |                                          |                                         |
| Follow-up time, median (range)            | 38.3 (0.1-51.4)                          | 38.9 (0.1-51.4)                         |
| Events                                    | 1430 (0.1)                               | 599 (0.1)                               |
| Death from other causes                   | 63 986 (5.7)                             | 25 443 (5.3)                            |
| Emigration                                | 76 272 (6.8)                             | 31 375 (6.6)                            |
| End of follow-up                          | 982 361 (87.4)                           | 420 036 (88.0)                          |
| <b>Pancreas</b>                           |                                          |                                         |
| Follow-up time, median (range)            | 38.3 (0.1-51.4)                          | 38.9 (0.1-51.4)                         |
| Events                                    | 2255 (0.2)                               | 943 (0.2)                               |
| Death from other causes                   | 63 231 (5.6)                             | 25 134 (5.3)                            |
| Emigration                                | 76 273 (6.8)                             | 31 377 (6.6)                            |
| End of follow-up                          | 982 290 (87.4)                           | 419 999 (88.0)                          |
| <b>Liver, bile ducts, and gallbladder</b> |                                          |                                         |
| Follow-up time, median (range)            | 38.3 (0.1-51.4)                          | 38.9 (0.1-51.4)                         |
| Events                                    | 2246 (0.2)                               | 925 (0.2)                               |
| Death from other causes                   | 63 322 (5.6)                             | 25 160 (5.3)                            |
| Emigration                                | 76 270 (6.8)                             | 31 375 (6.6)                            |
| End of follow-up                          | 982 211 (87.4)                           | 419 993 (88.0)                          |
| <b>Colon</b>                              |                                          |                                         |
| Follow-up time, median (range)            | 38.3 (0.1-51.4)                          | 38.9 (0.1-51.4)                         |
| Events                                    | 5320 (0.5)                               | 2177 (0.5)                              |
| Death from other causes                   | 63 009 (5.6)                             | 25 046 (5.3)                            |
| Emigration                                | 76 259 (6.8)                             | 31 374 (6.6)                            |
| End of follow-up                          | 979 461 (87.1)                           | 418 856 (87.7)                          |
| <b>Rectum</b>                             |                                          |                                         |
| Follow-up time, median (range)            | 38.3 (0.1-51.4)                          | 38.9 (0.1-51.4)                         |
| Events                                    | 3917 (0.4)                               | 1625 (0.3)                              |
| Death from other causes                   | 63 684 (5.7)                             | 25 304 (5.3)                            |
| Emigration                                | 76 267 (6.8)                             | 31 372 (6.6)                            |
| End of follow-up                          | 980 181 (87.2)                           | 419 152 (87.8)                          |
| <b>Kidney</b>                             |                                          |                                         |
| Follow-up time, median (range)            | 38.3 (0.1-51.4)                          | 38.9 (0.1-51.4)                         |
| Events                                    | 2741 (0.2)                               | 1151 (0.2)                              |
| Death from other causes                   | 64 174 (5.7)                             | 25 519 (5.3)                            |
| Emigration                                | 76 267 (6.8)                             | 31 373 (6.6)                            |
| End of follow-up                          | 980 867 (87.3)                           | 419 410 (87.8)                          |
| <b>Prostate</b>                           |                                          |                                         |
| Follow-up time, median (range)            | 38.2 (0.1-51.4)                          | 38.8 (0.1-51.4)                         |
| Events                                    | 24 225 (2.2)                             | 10 042 (2.1)                            |
| Death from other causes                   | 63 387 (5.6)                             | 25 229 (5.3)                            |

|                                |                 |                 |
|--------------------------------|-----------------|-----------------|
| Emigration                     | 76 211 (6.8)    | 31 353 (6.6)    |
| End of follow-up               | 960 225 (85.4)  | 410 829 (86.1)  |
| <b>Bladder</b>                 |                 |                 |
| Follow-up time, median (range) | 38.3 (0.1-51.4) | 38.9 (0.1-51.4) |
| Events                         | 3490 (0.3)      | 1432 (0.3)      |
| Death from other causes        | 64 374 (5.7)    | 25 594 (5.4)    |
| Emigration                     | 76 256 (6.8)    | 31 367 (6.6)    |
| End of follow-up               | 979 929 (87.2)  | 419 060 (87.8)  |
| <b>Myeloma</b>                 |                 |                 |
| Follow-up time, median (range) | 38.3 (0.1-51.4) | 38.9 (0.1-51.4) |
| Events                         | 1460 (0.1)      | 580 (0.1)       |
| Death from other causes        | 64 446 (5.7)    | 25 643 (5.4)    |
| Emigration                     | 76 271 (6.8)    | 31 374 (6.6)    |
| End of follow-up               | 981 872 (87.4)  | 419 856 (87.9)  |
| <b>Melanoma</b>                |                 |                 |
| Follow-up time, median (range) | 38.2 (0.1-51.4) | 38.8 (0.1-51.4) |
| Events                         | 10 026 (0.9)    | 4216 (0.9)      |
| Death from other causes        | 63 730 (5.7)    | 25 360 (5.3)    |
| Emigration                     | 76 207 (6.8)    | 31 359 (6.6)    |
| End of follow-up               | 974 086 (86.7)  | 416 518 (87.2)  |
| <b>Non-melanoma</b>            |                 |                 |
| Follow-up time, median (range) | 38.1 (0.1-51.4) | 38.7 (0.1-51.4) |
| Events                         | 27 302 (2.4)    | 11 509 (2.4)    |
| Death from other causes        | 63 579 (5.7)    | 25 284 (5.3)    |
| Emigration                     | 76 111 (6.8)    | 31 313 (6.6)    |
| End of follow-up               | 957 057 (85.1)  | 409 347 (85.7)  |

---

Number of events and numbers censored are shown as n (%).

**Supplementary table 3. Hazard ratios for cancer by quartiles of cardiorespiratory fitness in cohort and sibling analysis.**

| Cancer outcome by quartiles of cardiorespiratory fitness | Cohort analysis (N=1 124 049) |                   | Sibling analysis (N=477 453) |                   |
|----------------------------------------------------------|-------------------------------|-------------------|------------------------------|-------------------|
|                                                          | Cases, n (%)                  | HR (95% CI)       | Cases, n (%)                 | HR (95% CI)       |
| <b>Overall cancer diagnosis</b>                          |                               |                   |                              |                   |
| Q1                                                       | 33 673 (12.0)                 | Ref.              | 13 621 (11.5)                | Ref.              |
| Q2                                                       | 28 078 (9.8)                  | 1.01 (0.99, 1.02) | 11 693 (9.6)                 | 1.00 (0.96, 1.03) |
| Q3                                                       | 20 523 (7.4)                  | 1.03 (1.01, 1.05) | 8990 (7.6)                   | 1.02 (0.97, 1.06) |
| Q4                                                       | 16 136 (5.8)                  | 1.08 (1.06, 1.11) | 6989 (5.9)                   | 1.00 (0.95, 1.06) |
| <b>Overall cancer mortality</b>                          |                               |                   |                              |                   |
| Q1                                                       | 7093 (2.5)                    | Ref.              | 2790 (2.4)                   | Ref.              |
| Q2                                                       | 4810 (1.7)                    | 0.83 (0.80, 0.86) | 1981 (1.6)                   | 0.88 (0.81, 0.96) |
| Q3                                                       | 2960 (1.1)                    | 0.76 (0.73, 0.80) | 1300 (1.1)                   | 0.85 (0.77, 0.95) |
| Q4                                                       | 1926 (0.7)                    | 0.71 (0.67, 0.76) | 837 (0.7)                    | 0.78 (0.68, 0.89) |
| <b>Site-specific cancers</b>                             |                               |                   |                              |                   |
| <b>Head and neck</b>                                     |                               |                   |                              |                   |
| Q1                                                       | 1539 (0.6)                    | Ref.              | 629 (0.5)                    | Ref.              |
| Q2                                                       | 1148 (0.4)                    | 0.85 (0.79, 0.93) | 474 (0.4)                    | 0.94 (0.78, 1.12) |
| Q3                                                       | 782 (0.3)                     | 0.80 (0.73, 0.88) | 350 (0.3)                    | 0.84 (0.68, 1.04) |
| Q4                                                       | 557 (0.2)                     | 0.75 (0.67, 0.85) | 237 (0.2)                    | 0.80 (0.62, 1.04) |
| <b>Oesophagus</b>                                        |                               |                   |                              |                   |
| Q1                                                       | 536 (0.2)                     | Ref.              | 213 (0.2)                    | Ref.              |
| Q2                                                       | 346 (0.1)                     | 0.75 (0.65, 0.86) | 139 (0.1)                    | 0.95 (0.69, 1.32) |
| Q3                                                       | 185 (0.07)                    | 0.60 (0.50, 0.72) | 68 (0.06)                    | 0.68 (0.45, 1.03) |
| Q4                                                       | 111 (0.04)                    | 0.53 (0.42, 0.66) | 44 (0.04)                    | 0.61 (0.36, 1.02) |
| <b>Lung</b>                                              |                               |                   |                              |                   |
| Q1                                                       | 1562 (0.6)                    | Ref.              | 620 (0.5)                    | Ref.              |
| Q2                                                       | 871 (0.3)                     | 0.74 (0.68, 0.80) | 350 (0.3)                    | 0.81 (0.67, 0.98) |
| Q3                                                       | 460 (0.2)                     | 0.62 (0.55, 0.69) | 188 (0.2)                    | 0.73 (0.56, 0.93) |
| Q4                                                       | 238 (0.09)                    | 0.49 (0.42, 0.57) | 105 (0.09)                   | 0.50 (0.36, 0.70) |
| <b>Stomach</b>                                           |                               |                   |                              |                   |
| Q1                                                       | 597 (0.2)                     | Ref.              | 234 (0.2)                    | Ref.              |
| Q2                                                       | 405 (0.1)                     | 0.79 (0.70, 0.90) | 164 (0.1)                    | 0.90 (0.67, 1.21) |
| Q3                                                       | 256 (0.09)                    | 0.74 (0.63, 0.86) | 101 (0.08)                   | 0.69 (0.49, 0.98) |
| Q4                                                       | 172 (0.06)                    | 0.71 (0.58, 0.86) | 79 (0.07)                    | 0.90 (0.60, 1.37) |
| <b>Pancreas</b>                                          |                               |                   |                              |                   |
| Q1                                                       | 925 (0.3)                     | Ref.              | 369 (0.3)                    | Ref.              |
| Q2                                                       | 663 (0.2)                     | 0.86 (0.78, 0.95) | 270 (0.2)                    | 1.05 (0.83, 1.33) |
| Q3                                                       | 424 (0.2)                     | 0.84 (0.74, 0.95) | 191 (0.2)                    | 0.98 (0.74, 1.30) |
| Q4                                                       | 243 (0.09)                    | 0.73 (0.62, 0.85) | 113 (0.1)                    | 0.83 (0.59, 1.18) |
| <b>Liver, bile ducts, and gallbladder</b>                |                               |                   |                              |                   |
| Q1                                                       | 1038 (0.4)                    | Ref.              | 380 (0.3)                    | Ref.              |
| Q2                                                       | 657 (0.2)                     | 0.77 (0.69, 0.85) | 294 (0.2)                    | 1.10 (0.86, 1.39) |
| Q3                                                       | 333 (0.1)                     | 0.60 (0.52, 0.68) | 163 (0.1)                    | 0.97 (0.73, 1.28) |
| Q4                                                       | 218 (0.08)                    | 0.59 (0.50, 0.69) | 88 (0.07)                    | 0.78 (0.54, 1.13) |
| <b>Colon</b>                                             |                               |                   |                              |                   |
| Q1                                                       | 2001 (0.7)                    | Ref.              | 801 (0.7)                    | Ref.              |
| Q2                                                       | 1543 (0.5)                    | 0.91 (0.85, 0.97) | 618 (0.5)                    | 0.89 (0.76, 1.04) |
| Q3                                                       | 1050 (0.4)                    | 0.84 (0.78, 0.91) | 446 (0.4)                    | 0.92 (0.76, 1.11) |
| Q4                                                       | 726 (0.3)                     | 0.75 (0.68, 0.83) | 312 (0.3)                    | 0.78 (0.62, 0.99) |
| <b>Rectum</b>                                            |                               |                   |                              |                   |
| Q1                                                       | 1474 (0.5)                    | Ref.              | 615 (0.5)                    | Ref.              |
| Q2                                                       | 1154 (0.4)                    | 0.94 (0.87, 1.02) | 470 (0.4)                    | 0.90 (0.75, 1.07) |
| Q3                                                       | 764 (0.3)                     | 0.88 (0.80, 0.96) | 325 (0.3)                    | 0.84 (0.68, 1.04) |
| Q4                                                       | 525 (0.2)                     | 0.81 (0.72, 0.91) | 215 (0.2)                    | 0.69 (0.53, 0.90) |
| <b>Kidney</b>                                            |                               |                   |                              |                   |
| Q1                                                       | 1035 (0.4)                    | Ref.              | 416 (0.4)                    | Ref.              |
| Q2                                                       | 801 (0.3)                     | 0.84 (0.76, 0.92) | 352 (0.3)                    | 1.01 (0.81, 1.26) |
| Q3                                                       | 529 (0.2)                     | 0.73 (0.65, 0.82) | 226 (0.2)                    | 0.91 (0.70, 1.18) |
| Q4                                                       | 376 (0.1)                     | 0.65 (0.57, 0.75) | 157 (0.1)                    | 0.86 (0.63, 1.18) |
| <b>Prostate</b>                                          |                               |                   |                              |                   |
| Q1                                                       | 9678 (3.4)                    | Ref.              | 3887 (3.3)                   | Ref.              |
| Q2                                                       | 7507 (2.6)                    | 1.04 (1.01, 1.07) | 3061 (2.5)                   | 1.00 (0.94, 1.08) |
| Q3                                                       | 4449 (1.6)                    | 1.05 (1.01, 1.09) | 1947 (1.6)                   | 1.03 (0.94, 1.12) |
| Q4                                                       | 2591 (0.9)                    | 1.10 (1.05, 1.16) | 1147 (1.0)                   | 1.01 (0.90, 1.13) |
| <b>Bladder</b>                                           |                               |                   |                              |                   |
| Q1                                                       | 1427 (0.5)                    | Ref.              | 589 (0.5)                    | Ref.              |
| Q2                                                       | 1018 (0.4)                    | 0.90 (0.82, 0.97) | 405 (0.3)                    | 0.98 (0.81, 1.19) |
| Q3                                                       | 667 (0.2)                     | 0.89 (0.81, 0.99) | 270 (0.2)                    | 0.85 (0.68, 1.05) |
| Q4                                                       | 378 (0.1)                     | 0.75 (0.65, 0.85) | 168 (0.1)                    | 0.89 (0.66, 1.19) |
| <b>Myeloma</b>                                           |                               |                   |                              |                   |
| Q1                                                       | 516 (0.2)                     | Ref.              | 199 (0.2)                    | Ref.              |
| Q2                                                       | 429 (0.2)                     | 0.99 (0.86, 1.13) | 166 (0.1)                    | 0.76 (0.55, 1.04) |

|                   |            |                   |            |                   |
|-------------------|------------|-------------------|------------|-------------------|
| Q3                | 301 (0.1)  | 1.00 (0.86, 1.17) | 123 (0.1)  | 0.83 (0.57, 1.20) |
| Q4                | 214 (0.08) | 1.00 (0.83, 1.20) | 92 (0.08)  | 0.81 (0.50, 1.29) |
| Melanoma skin     |            |                   |            |                   |
| Q1                | 2622 (0.9) | Ref.              | 1031 (0.9) | Ref.              |
| Q2                | 2682 (0.9) | 1.13 (1.07, 1.19) | 1113 (0.9) | 1.08 (0.96, 1.22) |
| Q3                | 2396 (0.9) | 1.28 (1.21, 1.37) | 1067 (0.9) | 1.22 (1.06, 1.40) |
| Q4                | 2326 (0.8) | 1.50 (1.41, 1.61) | 1005 (0.9) | 1.30 (1.11, 1.52) |
| Non-melanoma skin |            |                   |            |                   |
| Q1                | 8441 (3.0) | Ref.              | 3374 (2.9) | Ref.              |
| Q2                | 7726 (2.7) | 1.13 (1.09, 1.17) | 3192 (2.6) | 1.03 (0.96, 1.11) |
| Q3                | 5957 (2.2) | 1.22 (1.18, 1.27) | 2689 (2.3) | 1.09 (1.01, 1.19) |
| Q4                | 5178 (1.9) | 1.44 (1.37, 1.50) | 2254 (1.9) | 1.09 (0.99, 1.20) |

CI = confidence interval. HR = hazard ratio. Q = quartile. HRs are adjusted for age at conscription, year of conscription, body mass index, parental education, and parental income. In both cohorts, the median (range) of  $W_{max}$  in Q1 was 217 (100-236), in Q2 it was 253 (237-270), in Q3 it was 290 (271-312), in Q4 it was 339 (313-999).

**Supplementary table 4. Standardised cumulative incidence of cancer at 65 years of age by quartiles of cardiorespiratory fitness in cohort and sibling analysis.**

| Cancer outcome by quartiles of cardiorespiratory fitness | Cohort analysis (N=1 124 049)                  |                         | Sibling analysis (N=477 453)                   |                         |
|----------------------------------------------------------|------------------------------------------------|-------------------------|------------------------------------------------|-------------------------|
|                                                          | Standardised incidence at age 65 y, % (95% CI) | Difference, pp (95% CI) | Standardised incidence at age 65 y, % (95% CI) | Difference, pp (95% CI) |
| <b>Overall cancer diagnosis</b>                          |                                                |                         |                                                |                         |
| Q1                                                       | 18.1 (17.8, 18.3)                              | Ref.                    | 17.8 (17.3, 18.4)                              | Ref.                    |
| Q2                                                       | 18.6 (18.4, 18.9)                              | 0.6 (0.2, 0.9)          | 17.8 (17.3, 18.3)                              | -0.004 (-0.9, 0.8)      |
| Q3                                                       | 19.0 (18.6, 19.2)                              | 0.9 (0.5, 1.3)          | 18.1 (17.5, 18.6)                              | 0.2 (-0.7, 1.2)         |
| Q4                                                       | 19.5 (19.2, 19.9)                              | 1.5 (1.0, 1.9)          | 17.9 (17.3, 18.6)                              | 0.08 (-0.9, 1.1)        |
| <b>Overall cancer mortality</b>                          |                                                |                         |                                                |                         |
| Q1                                                       | 3.0 (2.9, 3.1)                                 | Ref.                    | 2.8 (2.6, 3.0)                                 | Ref.                    |
| Q2                                                       | 2.2 (2.1, 2.3)                                 | -0.8 (-0.9, -0.7)       | 2.3 (2.1, 2.4)                                 | -0.5 (-0.8, -0.2)       |
| Q3                                                       | 2.0 (2.0, 2.1)                                 | -1.0 (-1.1, -0.8)       | 2.2 (2.0, 2.4)                                 | -0.6 (-0.9, -0.3)       |
| Q4                                                       | 1.9 (1.8, 2.0)                                 | -1.1 (-1.2, -0.9)       | 2.1 (1.8, 2.3)                                 | -0.7 (-1.1, -0.4)       |
| <b>Site-specific cancers</b>                             |                                                |                         |                                                |                         |
| <b>Head and neck</b>                                     |                                                |                         |                                                |                         |
| Q1                                                       | 0.8 (0.7, 0.8)                                 | Ref.                    | 0.7 (0.6, 0.8)                                 | Ref.                    |
| Q2                                                       | 0.6 (0.6, 0.6)                                 | -0.2 (-0.3, -0.1)       | 0.6 (0.5, 0.7)                                 | -0.1 (-0.3, 0.06)       |
| Q3                                                       | 0.6 (0.5, 0.6)                                 | -0.2 (-0.3, -0.1)       | 0.6 (0.5, 0.7)                                 | -0.2 (-0.3, -0.02)      |
| Q4                                                       | 0.5 (0.5, 0.6)                                 | -0.2 (-0.3, -0.2)       | 0.5 (0.4, 0.7)                                 | -0.2 (-0.4, -0.02)      |
| <b>Oesophagus</b>                                        |                                                |                         |                                                |                         |
| Q1                                                       | 0.3 (0.2, 0.3)                                 | Ref.                    | 0.2 (0.2, 0.3)                                 | Ref.                    |
| Q2                                                       | 0.2 (0.1, 0.2)                                 | -0.1 (-0.2, -0.08)      | 0.2 (0.1, 0.2)                                 | -0.05 (-0.1, 0.04)      |
| Q3                                                       | 0.1 (0.1, 0.2)                                 | -0.1 (-0.2, -0.09)      | 0.1 (0.1, 0.2)                                 | -0.08 (-0.2, 0.001)     |
| Q4                                                       | 0.1 (0.1, 0.2)                                 | -0.2 (-0.2, -0.1)       | 0.1 (0.1, 0.2)                                 | -0.09 (-0.2, -0.004)    |
| <b>Lung</b>                                              |                                                |                         |                                                |                         |
| Q1                                                       | 0.6 (0.6, 0.7)                                 | Ref.                    | 0.6 (0.5, 0.7)                                 | Ref.                    |
| Q2                                                       | 0.4 (0.3, 0.4)                                 | -0.3 (-0.3, -0.2)       | 0.4 (0.3, 0.5)                                 | -0.2 (-0.3, -0.07)      |
| Q3                                                       | 0.3 (0.3, 0.4)                                 | -0.3 (-0.4, -0.3)       | 0.4 (0.3, 0.4)                                 | -0.2 (-0.4, -0.09)      |
| Q4                                                       | 0.3 (0.2, 0.3)                                 | -0.4 (-0.4, -0.3)       | 0.3 (0.2, 0.3)                                 | -0.3 (-0.5, -0.2)       |
| <b>Stomach</b>                                           |                                                |                         |                                                |                         |
| Q1                                                       | 0.3 (0.2, 0.3)                                 | Ref.                    | 0.3 (0.2, 0.3)                                 | Ref.                    |
| Q2                                                       | 0.2 (0.2, 0.2)                                 | -0.08 (-0.1, -0.05)     | 0.2 (0.2, 0.3)                                 | -0.05 (-0.1, 0.04)      |
| Q3                                                       | 0.2 (0.2, 0.2)                                 | -0.09 (-0.1, -0.05)     | 0.2 (0.1, 0.2)                                 | -0.09 (-0.2, 0.002)     |
| Q4                                                       | 0.2 (0.1, 0.2)                                 | -0.1 (-0.1, -0.06)      | 0.2 (0.2, 0.3)                                 | -0.05 (0.2, 0.06)       |
| <b>Pancreas</b>                                          |                                                |                         |                                                |                         |
| Q1                                                       | 0.5 (0.4, 0.5)                                 | Ref.                    | 0.4 (0.3, 0.5)                                 | Ref.                    |
| Q2                                                       | 0.4 (0.3, 0.4)                                 | -0.1 (-0.2, -0.05)      | 0.4 (0.3, 0.5)                                 | 0.0002 (-0.1, 0.1)      |
| Q3                                                       | 0.4 (0.3, 0.4)                                 | -0.1 (-0.2, -0.05)      | 0.4 (0.3, 0.5)                                 | -0.02 (-0.2, 0.1)       |
| Q4                                                       | 0.3 (0.3, 0.4)                                 | -0.2 (-0.2, -0.08)      | 0.4 (0.3, 0.5)                                 | -0.07 (-0.2, 0.09)      |
| <b>Liver, bile ducts, and gallbladder</b>                |                                                |                         |                                                |                         |
| Q1                                                       | 0.5 (0.5, 0.6)                                 | Ref.                    | 0.4 (0.3, 0.5)                                 | Ref.                    |
| Q2                                                       | 0.3 (0.3, 0.3)                                 | -0.2 (-0.3, -0.1)       | 0.4 (0.3, 0.5)                                 | 0.01 (-0.1, 0.1)        |
| Q3                                                       | 0.3 (0.2, 0.3)                                 | -0.3 (-0.3, -0.2)       | 0.4 (0.3, 0.4)                                 | -0.02 (-0.2, 0.1)       |
| Q4                                                       | 0.3 (0.2, 0.3)                                 | -0.3 (-0.3, -0.2)       | 0.3 (0.2, 0.4)                                 | -0.08 (-0.2, 0.06)      |
| <b>Colon</b>                                             |                                                |                         |                                                |                         |
| Q1                                                       | 1.2 (1.1, 1.2)                                 | Ref.                    | 1.1 (1.0, 1.3)                                 | Ref.                    |
| Q2                                                       | 0.9 (0.9, 1.0)                                 | -0.2 (-0.3, -0.1)       | 0.9 (0.8, 1.0)                                 | -0.2 (-0.4, -0.02)      |
| Q3                                                       | 0.9 (0.8, 1.0)                                 | -0.3 (-0.4, -0.2)       | 0.9 (0.8, 1.1)                                 | -0.2 (-0.4, 0.07)       |
| Q4                                                       | 0.8 (0.8, 0.9)                                 | -0.3 (-0.5, -0.2)       | 0.8 (0.7, 1.0)                                 | -0.3 (-0.5, -0.02)      |
| <b>Rectum</b>                                            |                                                |                         |                                                |                         |
| Q1                                                       | 0.9 (0.8, 0.9)                                 | Ref.                    | 0.9 (0.7, 1.0)                                 | Ref.                    |
| Q2                                                       | 0.7 (0.7, 0.8)                                 | -0.1 (-0.2, -0.04)      | 0.7 (0.6, 0.8)                                 | -0.2 (-0.4, 0.003)      |
| Q3                                                       | 0.7 (0.6, 0.8)                                 | -0.2 (-0.3, -0.07)      | 0.6 (0.5, 0.8)                                 | -0.2 (-0.4, 0.01)       |
| Q4                                                       | 0.7 (0.6, 0.7)                                 | -0.2 (-0.3, -0.09)      | 0.6 (0.5, 0.7)                                 | -0.3 (-0.5, -0.09)      |
| <b>Kidney</b>                                            |                                                |                         |                                                |                         |
| Q1                                                       | 0.6 (0.6, 0.7)                                 | Ref.                    | 0.5 (0.4, 0.6)                                 | Ref.                    |
| Q2                                                       | 0.4 (0.4, 0.5)                                 | -0.2 (-0.3, -0.1)       | 0.5 (0.4, 0.6)                                 | -0.03 (-0.2, 0.1)       |
| Q3                                                       | 0.4 (0.4, 0.5)                                 | -0.2 (-0.3, -0.2)       | 0.5 (0.4, 0.6)                                 | -0.06 (-0.2, 0.1)       |
| Q4                                                       | 0.4 (0.3, 0.4)                                 | -0.3 (-0.4, -0.2)       | 0.4 (0.3, 0.6)                                 | -0.08 (-0.3, 0.09)      |
| <b>Prostate</b>                                          |                                                |                         |                                                |                         |
| Q1                                                       | 4.9 (4.7, 5.1)                                 | Ref.                    | 5.0 (4.7, 5.4)                                 | Ref.                    |
| Q2                                                       | 5.3 (5.1, 5.5)                                 | 0.4 (0.2, 0.6)          | 5.1 (4.8, 5.5)                                 | 0.06 (-0.4, 0.6)        |
| Q3                                                       | 5.4 (5.1, 5.6)                                 | 0.4 (0.2, 0.7)          | 5.2 (4.8, 5.6)                                 | 0.2 (-0.4, 0.7)         |
| Q4                                                       | 5.5 (5.3, 5.8)                                 | 0.6 (0.3, 0.9)          | 5.1 (4.7, 5.6)                                 | 0.08 (-0.6, 0.8)        |
| <b>Bladder</b>                                           |                                                |                         |                                                |                         |
| Q1                                                       | 0.7 (0.6, 0.7)                                 | Ref.                    | 0.6 (0.5, 0.7)                                 | Ref.                    |
| Q2                                                       | 0.5 (0.5, 0.6)                                 | -0.1 (-0.2, -0.06)      | 0.5 (0.5, 0.6)                                 | -0.05 (-0.2, 0.09)      |
| Q3                                                       | 0.5 (0.5, 0.6)                                 | -0.1 (-0.2, -0.05)      | 0.5 (0.4, 0.6)                                 | -0.1 (-0.3, 0.04)       |
| Q4                                                       | 0.5 (0.4, 0.5)                                 | -0.2 (-0.3, -0.1)       | 0.5 (0.4, 0.6)                                 | -0.09 (-0.3, 0.09)      |
| <b>Myeloma</b>                                           |                                                |                         |                                                |                         |
| Q1                                                       | 0.3 (0.2, 0.3)                                 | Ref.                    | 0.3 (0.2, 0.4)                                 | Ref.                    |

|                          |                |                       |                |                    |
|--------------------------|----------------|-----------------------|----------------|--------------------|
| Q2                       | 0.3 (0.2, 0.3) | -0.004 (-0.05, 0.04)  | 0.2 (0.2, 0.3) | -0.09 (-0.2, 0.02) |
| Q3                       | 0.3 (0.2, 0.3) | 0.00001 (-0.05, 0.05) | 0.2 (0.2, 0.3) | -0.08 (-0.2, 0.05) |
| Q4                       | 0.3 (0.2, 0.3) | 0.001 (-0.06, 0.06)   | 0.2 (0.2, 0.3) | -0.08 (-0.2, 0.06) |
| <b>Melanoma skin</b>     |                |                       |                |                    |
| Q1                       | 1.7 (1.5, 1.7) | Ref.                  | 1.7 (1.5, 1.8) | Ref.               |
| Q2                       | 2.2 (2.1, 2.3) | 0.6 (0.5, 0.8)        | 2.1 (1.8, 2.3) | 0.4 (0.06, 0.7)    |
| Q3                       | 2.4 (2.3, 2.6) | 0.8 (0.6, 1.0)        | 2.2 (2.0, 2.5) | 0.6 (0.2, 0.9)     |
| Q4                       | 2.7 (2.5, 2.8) | 1.0 (0.9, 1.3)        | 2.3 (2.0, 2.6) | 0.6 (0.2, 1.1)     |
| <b>Non-melanoma skin</b> |                |                       |                |                    |
| Q1                       | 4.4 (4.2, 4.5) | Ref.                  | 4.7 (4.4, 5.0) | Ref.               |
| Q2                       | 5.7 (5.6, 5.9) | 1.4 (1.1, 1.6)        | 5.1 (4.8, 5.4) | 0.4 (-0.1, 0.9)    |
| Q3                       | 6.1 (5.9, 6.3) | 1.7 (1.4, 2.0)        | 5.3 (5.0, 5.7) | 0.6 (0.03, 0.1)    |
| Q4                       | 6.7 (6.5, 7.0) | 2.4 (2.1, 2.7)        | 5.3 (4.9, 5.7) | 0.6 (-0.05, 0.1)   |

CI = confidence interval. Q = quartile. All estimates are adjusted for age at conscription, year of conscription, body mass index, parental education, and parental income. In both cohorts, the median (range) of  $W_{max}$  in Q1 was 217 (100-236), in Q2 it was 253 (237-270), in Q3 it was 290 (271-312), in Q4 it was 339 (313-999).



**Supplementary table 5. Population-attributable fraction for cancer at 65 years of age by cardiorespiratory fitness in cohort and sibling analysis, when considering a moderate (shifting those in quartile 1 to quartile 2) or a major intervention (shifting everyone to quartile 4).**

|                                    | Moderate intervention            |                                 | Major intervention               |                                 |
|------------------------------------|----------------------------------|---------------------------------|----------------------------------|---------------------------------|
|                                    | Cohort analysis<br>(N=1 124 049) | Sibling analysis<br>(N=477 453) | Cohort analysis<br>(N=1 124 049) | Sibling analysis<br>(N=477 453) |
| <b>Cancer outcome</b>              | <b>PAF, % (95% CI)</b>           | <b>PAF, % (95% CI)</b>          | <b>PAF, % (95% CI)</b>           | <b>PAF, % (95% CI)</b>          |
| <b>Overall cancer diagnosis</b>    | -2.0 (-3.0, -1.0)                | -0.1 (-2.5, 2.2)                | -5.3 (-6.8, -3.7)                | -0.2 (-3.6, 3.6)                |
| <b>Overall cancer mortality</b>    | 16.5 (14.4, 18.6)                | 11.3 (6.1, 16.6)                | 22.6 (19.2, 26.1)                | 17.2 (8.8, 25.5)                |
| <b>Site specific cancers</b>       |                                  |                                 |                                  |                                 |
| Head and neck                      | 14.0 (9.5, 18.4)                 | 9.3 (-1.9, 20.6)                | 18.9 (12.0, 25.8)                | 15.5 (-1.2, 32.2)               |
| Oesophagus                         | 26.4 (19.8, 33.1)                | 16.2 (-2.5, 34.9)               | 38.0 (27.0, 49.0)                | 32.0 (5.3, 58.7)                |
| Lung                               | 27.9 (23.8, 32.0)                | 22.9 (12.7, 33.1)               | 42.8 (35.7, 50.0)                | 41.4 (26.5, 56.2)               |
| Stomach                            | 18.6 (11.6, 25.6)                | 11.6 (-5.9, 29.1)               | 23.3 (11.8, 34.8)                | 7.1 (-22.2, 36.3)               |
| Pancreas                           | 13.6 (7.7, 19.5)                 | 1.6 (-14.7, 17.9)               | 21.4 (11.7, 31.0)                | 12.9 (-9.5, 35.3)               |
| Liver, bile ducts, and gallbladder | 24.8 (20.0, 29.8)                | 1.7 (-14.6, 17.9)               | 32.9 (24.3, 41.4)                | 17.9 (-5.8, 41.5)               |
| Colon                              | 11.1 (7.1, 15.1)                 | 9.7 (0.2, 19.3)                 | 18.7 (12.8, 24.6)                | 16.4 (2.5, 30.3)                |
| Rectum                             | 8.2 (3.4, 13.1)                  | 12.7 (2.2, 23.2)                | 14.5 (7.2, 21.7)                 | 26.7 (9.4, 37.9)                |
| Kidney                             | 17.6 (12.6, 22.7)                | 3.9 (-10.6, 18.3)               | 26.5 (19.2, 33.8)                | 10.6 (-10.3, 31.5)              |
| Prostate                           | -4.2 (-6.4, -1.9)                | -0.8 (-5.9, 4.3)                | -7.2 (-10.1, -3.4)               | -0.7 (-9.9, 7.4)                |
| Bladder                            | 10.9 (5.9, 15.8)                 | 6.0 (-6.6, 18.5)                | 20.1 (12.1, 28.1)                | 9.1 (-11.7, 29.8)               |
| Myeloma                            | 0.5 (-8.5, 9.4)                  | 16.0 (-2.3, 34.3)               | 0.2 (-13.5, 13.9)                | 14.2 (-13.9, 42.3)              |
| Melanoma skin                      | -18.2 (-22.7, -13.7)             | -12.9 (-21.6, -2.2)             | -32.3 (-38.5, -26.2)             | -19.1 (-32.2, -6.0)             |
| Non-melanoma skin                  | -16.0 (-18.5, -13.5)             | -4.3 (-9.5, 0.9)                | -28.8 (-32.5, -25.0)             | -5.9 (-13.1, 1.3)               |

CI = confidence interval. PAF = population-attributable fraction. All estimates were adjusted for age at conscription, year of conscription, body mass index, parental education, and parental income. Negative estimates imply a theoretically increased risk of the outcome in the population should the relevant intervention be carried out

**Supplementary table 6. Hazard ratios for cancer by quartiles of cardiorespiratory fitness in cohort analysis (as reported in the main article), in the sibling cohort using standard analysis, and in the sibling cohort using sibling analysis (as reported in the main article).**

|                                                             | Total cohort (standard) analysis<br>as reported in main article<br>(N=1 124 049) | Standard analysis<br>replicated in sibling cohort<br>(N=477 453) | Sibling analysis as<br>reported in main article<br>(N=477 453) |
|-------------------------------------------------------------|----------------------------------------------------------------------------------|------------------------------------------------------------------|----------------------------------------------------------------|
| Cancer outcome by quartiles of<br>cardiorespiratory fitness | HR (95% CI)                                                                      | HR (95% CI)                                                      | HR (95% CI)                                                    |
| <b>Overall cancer diagnosis</b>                             |                                                                                  |                                                                  |                                                                |
| Q1                                                          | Ref.                                                                             | Ref.                                                             | Ref.                                                           |
| Q2                                                          | 1.01 (0.99, 1.02)                                                                | 1.00 (0.98, 1.03)                                                | 1.00 (0.96, 1.03)                                              |
| Q3                                                          | 1.03 (1.01, 1.05)                                                                | 1.06 (1.03, 1.09)                                                | 1.02 (0.97, 1.06)                                              |
| Q4                                                          | 1.08 (1.06, 1.11)                                                                | 1.09 (1.06, 1.13)                                                | 1.00 (0.95, 1.06)                                              |
| <b>Overall cancer mortality</b>                             |                                                                                  |                                                                  |                                                                |
| Q1                                                          | Ref.                                                                             | Ref.                                                             | Ref.                                                           |
| Q2                                                          | 0.83 (0.80, 0.86)                                                                | 0.83 (0.78, 0.88)                                                | 0.88 (0.81, 0.96)                                              |
| Q3                                                          | 0.76 (0.73, 0.80)                                                                | 0.77 (0.72, 0.82)                                                | 0.85 (0.77, 0.95)                                              |
| Q4                                                          | 0.71 (0.67, 0.76)                                                                | 0.68 (0.63, 0.74)                                                | 0.78 (0.68, 0.89)                                              |
| <b>Site-specific cancers</b>                                |                                                                                  |                                                                  |                                                                |
| <b>Head and neck</b>                                        |                                                                                  |                                                                  |                                                                |
| Q1                                                          | Ref.                                                                             | Ref.                                                             | Ref.                                                           |
| Q2                                                          | 0.85 (0.79, 0.93)                                                                | 0.83 (0.73, 0.93)                                                | 0.94 (0.78, 1.12)                                              |
| Q3                                                          | 0.80 (0.73, 0.88)                                                                | 0.80 (0.70, 0.92)                                                | 0.84 (0.68, 1.04)                                              |
| Q4                                                          | 0.75 (0.67, 0.85)                                                                | 0.69 (0.58, 0.81)                                                | 0.80 (0.62, 1.04)                                              |
| <b>Oesophagus</b>                                           |                                                                                  |                                                                  |                                                                |
| Q1                                                          | Ref.                                                                             | Ref.                                                             | Ref.                                                           |
| Q2                                                          | 0.75 (0.65, 0.86)                                                                | 0.73 (0.58, 0.91)                                                | 0.95 (0.69, 1.32)                                              |
| Q3                                                          | 0.60 (0.50, 0.72)                                                                | 0.52 (0.39, 0.69)                                                | 0.68 (0.45, 1.03)                                              |
| Q4                                                          | 0.53 (0.42, 0.66)                                                                | 0.48 (0.34, 0.69)                                                | 0.61 (0.36, 1.02)                                              |
| <b>Lung</b>                                                 |                                                                                  |                                                                  |                                                                |
| Q1                                                          | Ref.                                                                             | Ref.                                                             | Ref.                                                           |
| Q2                                                          | 0.74 (0.68, 0.80)                                                                | 0.71 (0.62, 0.81)                                                | 0.81 (0.67, 0.98)                                              |
| Q3                                                          | 0.62 (0.55, 0.69)                                                                | 0.57 (0.48, 0.68)                                                | 0.73 (0.56, 0.93)                                              |
| Q4                                                          | 0.49 (0.42, 0.57)                                                                | 0.47 (0.37, 0.59)                                                | 0.50 (0.36, 0.70)                                              |
| <b>Stomach</b>                                              |                                                                                  |                                                                  |                                                                |
| Q1                                                          | Ref.                                                                             | Ref.                                                             | Ref.                                                           |
| Q2                                                          | 0.79 (0.70, 0.90)                                                                | 0.76 (0.62, 0.93)                                                | 0.90 (0.67, 1.21)                                              |
| Q3                                                          | 0.74 (0.63, 0.86)                                                                | 0.63 (0.49, 0.80)                                                | 0.69 (0.49, 0.98)                                              |
| Q4                                                          | 0.71 (0.58, 0.86)                                                                | 0.67 (0.50, 0.90)                                                | 0.90 (0.60, 1.37)                                              |
| <b>Pancreas</b>                                             |                                                                                  |                                                                  |                                                                |
| Q1                                                          | Ref.                                                                             | Ref.                                                             | Ref.                                                           |
| Q2                                                          | 0.86 (0.78, 0.95)                                                                | 0.84 (0.71, 0.99)                                                | 1.05 (0.83, 1.33)                                              |
| Q3                                                          | 0.84 (0.74, 0.95)                                                                | 0.86 (0.71, 1.04)                                                | 0.98 (0.74, 1.30)                                              |
| Q4                                                          | 0.73 (0.62, 0.85)                                                                | 0.74 (0.58, 0.93)                                                | 0.83 (0.59, 1.18)                                              |
| <b>Liver, bile ducts, and gallbladder</b>                   |                                                                                  |                                                                  |                                                                |
| Q1                                                          | Ref.                                                                             | Ref.                                                             | Ref.                                                           |
| Q2                                                          | 0.77 (0.69, 0.85)                                                                | 0.87 (0.74, 1.01)                                                | 1.10 (0.86, 1.39)                                              |
| Q3                                                          | 0.60 (0.52, 0.68)                                                                | 0.69 (0.57, 0.84)                                                | 0.97 (0.73, 1.28)                                              |
| Q4                                                          | 0.59 (0.50, 0.69)                                                                | 0.53 (0.41, 0.69)                                                | 0.78 (0.54, 1.13)                                              |
| <b>Colon</b>                                                |                                                                                  |                                                                  |                                                                |
| Q1                                                          | Ref.                                                                             | Ref.                                                             | Ref.                                                           |
| Q2                                                          | 0.91 (0.85, 0.97)                                                                | 0.88 (0.79, 0.98)                                                | 0.89 (0.76, 1.04)                                              |
| Q3                                                          | 0.84 (0.78, 0.91)                                                                | 0.83 (0.74, 0.95)                                                | 0.92 (0.76, 1.11)                                              |
| Q4                                                          | 0.75 (0.68, 0.83)                                                                | 0.74 (0.64, 0.86)                                                | 0.78 (0.62, 0.99)                                              |
| <b>Rectum</b>                                               |                                                                                  |                                                                  |                                                                |
| Q1                                                          | Ref.                                                                             | Ref.                                                             | Ref.                                                           |
| Q2                                                          | 0.94 (0.87, 1.02)                                                                | 0.88 (0.77, 0.99)                                                | 0.90 (0.75, 1.07)                                              |
| Q3                                                          | 0.88 (0.80, 0.96)                                                                | 0.83 (0.71, 0.95)                                                | 0.84 (0.68, 1.04)                                              |
| Q4                                                          | 0.81 (0.72, 0.91)                                                                | 0.72 (0.60, 0.86)                                                | 0.69 (0.53, 0.90)                                              |
| <b>Kidney</b>                                               |                                                                                  |                                                                  |                                                                |
| Q1                                                          | Ref.                                                                             | Ref.                                                             | Ref.                                                           |
| Q2                                                          | 0.84 (0.76, 0.92)                                                                | 0.91 (0.79, 1.05)                                                | 1.01 (0.81, 1.26)                                              |
| Q3                                                          | 0.73 (0.65, 0.82)                                                                | 0.75 (0.63, 0.90)                                                | 0.91 (0.70, 1.18)                                              |
| Q4                                                          | 0.65 (0.57, 0.75)                                                                | 0.65 (0.53, 0.80)                                                | 0.86 (0.63, 1.18)                                              |
| <b>Prostate</b>                                             |                                                                                  |                                                                  |                                                                |
| Q1                                                          | Ref.                                                                             | Ref.                                                             | Ref.                                                           |
| Q2                                                          | 1.04 (1.01, 1.07)                                                                | 1.01 (0.96, 1.06)                                                | 1.00 (0.94, 1.08)                                              |
| Q3                                                          | 1.05 (1.01, 1.09)                                                                | 1.05 (0.99, 1.12)                                                | 1.03 (0.94, 1.12)                                              |
| Q4                                                          | 1.10 (1.05, 1.16)                                                                | 1.07 (0.99, 1.15)                                                | 1.01 (0.90, 1.13)                                              |
| <b>Bladder</b>                                              |                                                                                  |                                                                  |                                                                |
| Q1                                                          | Ref.                                                                             | Ref.                                                             | Ref.                                                           |
| Q2                                                          | 0.90 (0.82, 0.97)                                                                | 0.82 (0.72, 0.93)                                                | 0.98 (0.81, 1.19)                                              |
| Q3                                                          | 0.89 (0.81, 0.99)                                                                | 0.80 (0.68, 0.93)                                                | 0.85 (0.68, 1.05)                                              |
| Q4                                                          | 0.75 (0.65, 0.85)                                                                | 0.72 (0.59, 0.87)                                                | 0.89 (0.66, 1.19)                                              |
| <b>Myeloma</b>                                              |                                                                                  |                                                                  |                                                                |

|                   |                   |                   |                   |
|-------------------|-------------------|-------------------|-------------------|
| Q1                | Ref.              | Ref.              | Ref.              |
| Q2                | 0.99 (0.86, 1.13) | 0.97 (0.78, 1.19) | 0.76 (0.55, 1.04) |
| Q3                | 1.00 (0.86, 1.17) | 1.02 (0.80, 1.29) | 0.83 (0.57, 1.20) |
| Q4                | 1.00 (0.83, 1.20) | 1.06 (0.80, 1.41) | 0.81 (0.50, 1.29) |
| Melanoma skin     |                   |                   |                   |
| Q1                | Ref.              | Ref.              | Ref.              |
| Q2                | 1.13 (1.07, 1.19) | 1.18 (1.08, 1.29) | 1.08 (0.96, 1.22) |
| Q3                | 1.28 (1.21, 1.37) | 1.43 (1.31, 1.57) | 1.22 (1.06, 1.40) |
| Q4                | 1.50 (1.41, 1.61) | 1.66 (1.50, 1.84) | 1.30 (1.11, 1.52) |
| Non-melanoma skin |                   |                   |                   |
| Q1                | Ref.              | Ref.              | Ref.              |
| Q2                | 1.13 (1.09, 1.17) | 1.15 (1.09, 1.20) | 1.03 (0.96, 1.11) |
| Q3                | 1.22 (1.18, 1.27) | 1.34 (1.26, 1.41) | 1.09 (1.01, 1.19) |
| Q4                | 1.44 (1.37, 1.50) | 1.52 (1.43, 1.62) | 1.09 (0.99, 1.20) |

---

CI = confidence interval. HR = hazard ratio. Q = quartile. All estimates were adjusted for birth cohort, year of conscription, body mass index, parental education, and parental income. In both cohorts, the median (range) of  $W_{max}$  in Q1 was 217 (100-236), in Q2 it was 253 (237-270), in Q3 it was 290 (271-312), in Q4 it was 339 (313-999).

**Supplementary table 7. Hazard ratios for cancer by quartiles of cardiorespiratory fitness in cohort and sibling analysis, with and without adjusting for body mass index.**

| Cancer outcome by quartiles of cardiorespiratory fitness | Cohort analysis (N=1 124 049)          |                                     | Sibling analysis (N=477 453)           |                                     |
|----------------------------------------------------------|----------------------------------------|-------------------------------------|----------------------------------------|-------------------------------------|
|                                                          | HR (95% CI) without adjustment for BMI | HR (95% CI) with adjustment for BMI | HR (95% CI) without adjustment for BMI | HR (95% CI) with adjustment for BMI |
| <b>Overall cancer diagnosis</b>                          |                                        |                                     |                                        |                                     |
| Q1                                                       | Ref.                                   | Ref.                                | Ref.                                   | Ref.                                |
| Q2                                                       | 1.01 (1.00, 1.03)                      | 1.01 (0.99, 1.02)                   | 1.00 (0.96, 1.04)                      | 1.00 (0.96, 1.03)                   |
| Q3                                                       | 1.04 (1.02, 1.06)                      | 1.03 (1.01, 1.05)                   | 1.02 (0.98, 1.06)                      | 1.02 (0.97, 1.06)                   |
| Q4                                                       | 1.10 (1.08, 1.12)                      | 1.08 (1.06, 1.11)                   | 1.01 (0.96, 1.06)                      | 1.00 (0.95, 1.06)                   |
| <b>Overall cancer mortality</b>                          |                                        |                                     |                                        |                                     |
| Q1                                                       | Ref.                                   | Ref.                                | Ref.                                   | Ref.                                |
| Q2                                                       | 0.87 (0.84, 0.90)                      | 0.83 (0.80, 0.86)                   | 0.90 (0.83, 0.98)                      | 0.88 (0.81, 0.96)                   |
| Q3                                                       | 0.81 (0.78, 0.85)                      | 0.76 (0.73, 0.80)                   | 0.88 (0.79, 0.97)                      | 0.85 (0.77, 0.95)                   |
| Q4                                                       | 0.78 (0.74, 0.82)                      | 0.71 (0.67, 0.76)                   | 0.82 (0.72, 0.93)                      | 0.78 (0.68, 0.89)                   |
| <b>Site-specific cancer</b>                              |                                        |                                     |                                        |                                     |
| <b>Head and neck</b>                                     |                                        |                                     |                                        |                                     |
| Q1                                                       | Ref.                                   | Ref.                                | Ref.                                   | Ref.                                |
| Q2                                                       | 0.90 (0.83, 0.97)                      | 0.85 (0.79, 0.93)                   | 0.93 (0.78, 1.11)                      | 0.94 (0.78, 1.12)                   |
| Q3                                                       | 0.86 (0.79, 0.95)                      | 0.80 (0.73, 0.88)                   | 0.83 (0.68, 1.03)                      | 0.84 (0.68, 1.04)                   |
| Q4                                                       | 0.84 (0.75, 0.93)                      | 0.75 (0.67, 0.85)                   | 0.79 (0.61, 1.03)                      | 0.80 (0.62, 1.04)                   |
| <b>Oesophagus</b>                                        |                                        |                                     |                                        |                                     |
| Q1                                                       | Ref.                                   | Ref.                                | Ref.                                   | Ref.                                |
| Q2                                                       | 0.83 (0.73, 0.95)                      | 0.75 (0.65, 0.86)                   | 0.99 (0.72, 1.37)                      | 0.95 (0.69, 1.32)                   |
| Q3                                                       | 0.69 (0.58, 0.82)                      | 0.60 (0.50, 0.72)                   | 0.72 (0.48, 1.08)                      | 0.68 (0.45, 1.03)                   |
| Q4                                                       | 0.63 (0.51, 0.79)                      | 0.53 (0.42, 0.66)                   | 0.66 (0.39, 1.09)                      | 0.61 (0.36, 1.02)                   |
| <b>Lung</b>                                              |                                        |                                     |                                        |                                     |
| Q1                                                       | Ref.                                   | Ref.                                | Ref.                                   | Ref.                                |
| Q2                                                       | 0.74 (0.68, 0.81)                      | 0.74 (0.68, 0.80)                   | 0.79 (0.65, 0.95)                      | 0.81 (0.67, 0.98)                   |
| Q3                                                       | 0.62 (0.56, 0.70)                      | 0.62 (0.55, 0.69)                   | 0.70 (0.55, 0.89)                      | 0.73 (0.56, 0.93)                   |
| Q4                                                       | 0.50 (0.43, 0.58)                      | 0.49 (0.42, 0.57)                   | 0.48 (0.34, 0.66)                      | 0.50 (0.36, 0.70)                   |
| <b>Stomach</b>                                           |                                        |                                     |                                        |                                     |
| Q1                                                       | Ref.                                   | Ref.                                | Ref.                                   | Ref.                                |
| Q2                                                       | 0.87 (0.76, 0.99)                      | 0.79 (0.70, 0.90)                   | 0.94 (0.70, 1.25)                      | 0.90 (0.67, 1.21)                   |
| Q3                                                       | 0.83 (0.71, 0.97)                      | 0.74 (0.63, 0.86)                   | 0.73 (0.52, 1.02)                      | 0.69 (0.49, 0.98)                   |
| Q4                                                       | 0.83 (0.69, 1.00)                      | 0.71 (0.58, 0.86)                   | 0.98 (0.65, 1.47)                      | 0.90 (0.60, 1.37)                   |
| <b>Pancreas</b>                                          |                                        |                                     |                                        |                                     |
| Q1                                                       | Ref.                                   | Ref.                                | Ref.                                   | Ref.                                |
| Q2                                                       | 0.92 (0.83, 1.02)                      | 0.86 (0.78, 0.95)                   | 1.11 (0.88, 1.41)                      | 1.05 (0.83, 1.33)                   |
| Q3                                                       | 0.92 (0.81, 1.04)                      | 0.84 (0.74, 0.95)                   | 1.07 (0.81, 1.41)                      | 0.98 (0.74, 1.30)                   |
| Q4                                                       | 0.82 (0.70, 0.96)                      | 0.73 (0.62, 0.85)                   | 0.93 (0.66, 1.30)                      | 0.83 (0.59, 1.18)                   |
| <b>Liver, bile ducts, and gallbladder</b>                |                                        |                                     |                                        |                                     |
| Q1                                                       | Ref.                                   | Ref.                                | Ref.                                   | Ref.                                |
| Q2                                                       | 0.83 (0.76, 0.92)                      | 0.77 (0.69, 0.85)                   | 1.16 (0.92, 1.47)                      | 1.10 (0.86, 1.39)                   |
| Q3                                                       | 0.67 (0.59, 0.76)                      | 0.60 (0.52, 0.68)                   | 1.06 (0.80, 1.39)                      | 0.97 (0.73, 1.28)                   |
| Q4                                                       | 0.68 (0.58, 0.80)                      | 0.59 (0.50, 0.69)                   | 0.87 (0.61, 1.25)                      | 0.78 (0.54, 1.13)                   |
| <b>Colon</b>                                             |                                        |                                     |                                        |                                     |
| Q1                                                       | Ref.                                   | Ref.                                | Ref.                                   | Ref.                                |
| Q2                                                       | 0.93 (0.87, 1.00)                      | 0.91 (0.85, 0.97)                   | 0.90 (0.78, 1.05)                      | 0.89 (0.76, 1.04)                   |
| Q3                                                       | 0.88 (0.81, 0.95)                      | 0.84 (0.78, 0.91)                   | 0.94 (0.78, 1.13)                      | 0.92 (0.76, 1.11)                   |
| Q4                                                       | 0.80 (0.72, 0.88)                      | 0.75 (0.68, 0.83)                   | 0.81 (0.64, 1.01)                      | 0.78 (0.62, 0.99)                   |
| <b>Rectum</b>                                            |                                        |                                     |                                        |                                     |
| Q1                                                       | Ref.                                   | Ref.                                | Ref.                                   | Ref.                                |
| Q2                                                       | 0.96 (0.89, 1.04)                      | 0.94 (0.87, 1.02)                   | 0.94 (0.78, 1.12)                      | 0.90 (0.75, 1.07)                   |
| Q3                                                       | 0.90 (0.82, 0.99)                      | 0.88 (0.80, 0.96)                   | 0.90 (0.73, 1.10)                      | 0.84 (0.68, 1.04)                   |
| Q4                                                       | 0.84 (0.75, 0.94)                      | 0.81 (0.72, 0.91)                   | 0.75 (0.58, 0.97)                      | 0.69 (0.53, 0.90)                   |
| <b>Kidney</b>                                            |                                        |                                     |                                        |                                     |
| Q1                                                       | Ref.                                   | Ref.                                | Ref.                                   | Ref.                                |
| Q2                                                       | 0.93 (0.85, 1.02)                      | 0.84 (0.76, 0.92)                   | 1.06 (0.86, 1.32)                      | 1.01 (0.81, 1.26)                   |
| Q3                                                       | 0.85 (0.76, 0.95)                      | 0.73 (0.65, 0.82)                   | 0.98 (0.76, 1.25)                      | 0.91 (0.70, 1.18)                   |
| Q4                                                       | 0.79 (0.69, 0.91)                      | 0.65 (0.57, 0.75)                   | 0.95 (0.70, 1.29)                      | 0.86 (0.63, 1.18)                   |
| <b>Prostate</b>                                          |                                        |                                     |                                        |                                     |
| Q1                                                       | Ref.                                   | Ref.                                | Ref.                                   | Ref.                                |
| Q2                                                       | 1.04 (1.01, 1.07)                      | 1.04 (1.01, 1.07)                   | 1.00 (0.93, 1.07)                      | 1.00 (0.94, 1.08)                   |
| Q3                                                       | 1.05 (1.01, 1.09)                      | 1.05 (1.01, 1.09)                   | 1.02 (0.94, 1.11)                      | 1.03 (0.94, 1.12)                   |
| Q4                                                       | 1.10 (1.05, 1.15)                      | 1.10 (1.05, 1.16)                   | 1.00 (0.90, 1.12)                      | 1.01 (0.90, 1.13)                   |
| <b>Bladder</b>                                           |                                        |                                     |                                        |                                     |
| Q1                                                       | Ref.                                   | Ref.                                | Ref.                                   | Ref.                                |
| Q2                                                       | 0.92 (0.85, 1.00)                      | 0.90 (0.82, 0.97)                   | 0.99 (0.82, 1.20)                      | 0.98 (0.81, 1.19)                   |
| Q3                                                       | 0.93 (0.84, 1.02)                      | 0.89 (0.81, 0.99)                   | 0.86 (0.69, 1.07)                      | 0.85 (0.68, 1.05)                   |
| Q4                                                       | 0.78 (0.69, 0.89)                      | 0.75 (0.65, 0.85)                   | 0.91 (0.68, 1.21)                      | 0.89 (0.66, 1.19)                   |
| <b>Myeloma</b>                                           |                                        |                                     |                                        |                                     |

|                   |                   |                   |                   |                   |
|-------------------|-------------------|-------------------|-------------------|-------------------|
| Q1                | Ref.              | Ref.              | Ref.              | Ref.              |
| Q2                | 1.04 (0.90, 1.18) | 0.99 (0.86, 1.13) | 0.78 (0.57, 1.07) | 0.76 (0.55, 1.04) |
| Q3                | 1.07 (0.92, 1.25) | 1.00 (0.86, 1.17) | 0.87 (0.61, 1.26) | 0.83 (0.57, 1.20) |
| Q4                | 1.09 (0.91, 1.31) | 1.00 (0.83, 1.20) | 0.86 (0.55, 1.36) | 0.81 (0.50, 1.29) |
| Melanoma skin     |                   |                   |                   |                   |
| Q1                | Ref.              | Ref.              | Ref.              | Ref.              |
| Q2                | 1.17 (1.10, 1.23) | 1.13 (1.07, 1.19) | 1.11 (0.98, 1.25) | 1.08 (0.96, 1.22) |
| Q3                | 1.34 (1.27, 1.43) | 1.28 (1.21, 1.37) | 1.26 (1.11, 1.44) | 1.22 (1.06, 1.40) |
| Q4                | 1.60 (1.50, 1.71) | 1.50 (1.41, 1.61) | 1.36 (1.17, 1.59) | 1.30 (1.11, 1.52) |
| Non-melanoma skin |                   |                   |                   |                   |
| Q1                | Ref.              | Ref.              | Ref.              | Ref.              |
| Q2                | 1.10 (1.06, 1.13) | 1.13 (1.09, 1.17) | 1.01 (0.95, 1.09) | 1.03 (0.96, 1.11) |
| Q3                | 1.17 (1.13, 1.21) | 1.22 (1.18, 1.27) | 1.06 (0.98, 1.15) | 1.09 (1.01, 1.19) |
| Q4                | 1.35 (1.30, 1.40) | 1.44 (1.37, 1.50) | 1.05 (0.96, 1.15) | 1.09 (0.99, 1.20) |

BMI = body mass index. CI = confidence interval. HR = hazard ratio. Q = quartile. All estimates were adjusted for birth cohort, year of conscription, parental education, and parental income. In both cohorts, the median (range) of  $W_{max}$  in Q1 was 217 (100-236), in Q2 it was 253 (237-270), in Q3 it was 290 (271-312), in Q4 it was 339 (313-999).



|                   |                |                       |                |                      |                |                    |                |                     |
|-------------------|----------------|-----------------------|----------------|----------------------|----------------|--------------------|----------------|---------------------|
| Q1                | 1.2 (1.1, 1.2) | Ref.                  | 1.1 (1.0, 1.1) | Ref.                 | 1.1 (1.0, 1.3) | Ref.               | 1.0 (0.9, 1.2) | Ref.                |
| Q2                | 0.9 (0.9, 1.0) | -0.2 (-0.3, -0.1)     | 0.9 (0.8, 1.0) | -0.2 (-0.3, -0.09)   | 0.9 (0.8, 1.0) | -0.2 (-0.4, -0.02) | 0.9 (0.7, 1.0) | -0.2 (-0.4, 0.03)   |
| Q3                | 0.9 (0.8, 1.0) | -0.3 (-0.4, -0.2)     | 0.9 (0.8, 0.9) | -0.2 (-0.3, -0.1)    | 0.9 (0.8, 1.1) | -0.2 (-0.4, 0.07)  | 0.9 (0.8, 1.0) | -0.1 (-0.4, 0.09)   |
| Q4                | 0.8 (0.8, 0.9) | -0.3 (-0.5, -0.2)     | 0.8 (0.7, 0.9) | -0.3 (-0.4, -0.2)    | 0.8 (0.7, 1.0) | -0.3 (-0.5, -0.02) | 0.8 (0.7, 0.9) | -0.2 (-0.5, 0.008)  |
| Rectum            |                |                       |                |                      |                |                    |                |                     |
| Q1                | 0.9 (0.8, 0.9) | Ref.                  | 0.8 (0.7, 0.9) | Ref.                 | 0.9 (0.7, 1.0) | Ref.               | 0.8 (0.7, 0.9) | Ref.                |
| Q2                | 0.7 (0.7, 0.8) | -0.1 (-0.2, -0.04)    | 0.7 (0.7, 0.8) | -0.1 (-0.2, -0.007)  | 0.7 (0.6, 0.8) | -0.2 (-0.4, 0.003) | 0.6 (0.5, 0.8) | -0.2 (-0.4, 0.02)   |
| Q3                | 0.7 (0.6, 0.8) | -0.2 (-0.3, -0.07)    | 0.7 (0.6, 0.7) | -0.1 (-0.2, -0.03)   | 0.6 (0.5, 0.8) | -0.2 (-0.4, 0.01)  | 0.6 (0.5, 0.7) | -0.2 (-0.4, 0.007)  |
| Q4                | 0.7 (0.6, 0.7) | -0.2 (-0.3, -0.09)    | 0.6 (0.6, 0.7) | -0.2 (-0.3, -0.05)   | 0.6 (0.5, 0.7) | -0.3 (-0.5, -0.09) | 0.5 (0.4, 0.7) | -0.3 (-0.5, -0.007) |
| Kidney            |                |                       |                |                      |                |                    |                |                     |
| Q1                | 0.6 (0.6, 0.7) | Ref.                  | 0.6 (0.5, 0.6) | Ref.                 | 0.5 (0.4, 0.6) | Ref.               | 0.5 (0.4, 0.6) | Ref.                |
| Q2                | 0.4 (0.4, 0.5) | -0.2 (-0.3, -0.1)     | 0.4 (0.4, 0.5) | -0.2 (-0.2, -0.1)    | 0.5 (0.4, 0.6) | -0.03 (-0.2, 0.1)  | 0.5 (0.4, 0.6) | -0.01 (-0.2, 0.1)   |
| Q3                | 0.4 (0.4, 0.5) | -0.2 (-0.3, -0.2)     | 0.4 (0.3, 0.4) | -0.2 (-0.3, -0.1)    | 0.5 (0.4, 0.6) | -0.06 (-0.2, 0.1)  | 0.4 (0.4, 0.5) | -0.05 (-0.2, 0.1)   |
| Q4                | 0.4 (0.3, 0.4) | -0.3 (-0.4, -0.2)     | 0.4 (0.3, 0.4) | -0.2 (-0.3, -0.2)    | 0.4 (0.3, 0.6) | -0.08 (-0.3, 0.09) | 0.4 (0.3, 0.5) | -0.06 (-0.2, 0.1)   |
| Prostate          |                |                       |                |                      |                |                    |                |                     |
| Q1                | 4.9 (4.7, 5.1) | Ref.                  | 4.5 (4.3, 4.7) | Ref.                 | 5.0 (4.7, 5.4) | Ref.               | 4.7 (4.3, 5.0) | Ref.                |
| Q2                | 5.3 (5.1, 5.5) | 0.4 (0.2, 0.6)        | 5.0 (4.8, 5.2) | 0.5 (0.3, 0.7)       | 5.1 (4.8, 5.5) | 0.06 (-0.4, 0.6)   | 4.8 (4.5, 5.2) | 0.2 (-0.3, 0.6)     |
| Q3                | 5.4 (5.1, 5.6) | 0.4 (0.2, 0.7)        | 5.1 (4.9, 5.3) | 0.6 (0.4, 0.9)       | 5.2 (4.8, 5.6) | 0.2 (-0.4, 0.7)    | 4.9 (4.5, 5.3) | 0.3 (-0.3, 0.8)     |
| Q4                | 5.5 (5.3, 5.8) | 0.6 (0.3, 0.9)        | 5.3 (5.1, 5.6) | 0.8 (0.6, 1.1)       | 5.1 (4.7, 5.6) | 0.08 (-0.6, 0.8)   | 4.9 (4.5, 5.4) | 0.2 (-0.4, 0.9)     |
| Bladder           |                |                       |                |                      |                |                    |                |                     |
| Q1                | 0.7 (0.6, 0.7) | Ref.                  | 0.6 (0.6, 0.7) | Ref.                 | 0.6 (0.5, 0.7) | Ref.               | 0.6 (0.5, 0.6) | Ref.                |
| Q2                | 0.5 (0.5, 0.6) | -0.1 (-0.2, -0.06)    | 0.5 (0.5, 0.6) | -0.1 (-0.2, -0.03)   | 0.5 (0.5, 0.6) | -0.05 (-0.2, 0.09) | 0.5 (0.4, 0.6) | -0.04 (-0.2, 0.09)  |
| Q3                | 0.5 (0.5, 0.6) | -0.1 (-0.2, -0.05)    | 0.5 (0.5, 0.6) | -0.1 (-0.2, -0.02)   | 0.5 (0.4, 0.6) | -0.1 (-0.3, 0.04)  | 0.5 (0.4, 0.6) | -0.09 (-0.2, 0.05)  |
| Q4                | 0.5 (0.4, 0.5) | -0.2 (-0.3, -0.1)     | 0.5 (0.4, 0.5) | -0.2 (-0.2, -0.08)   | 0.5 (0.4, 0.6) | -0.09 (-0.3, 0.09) | 0.5 (0.4, 0.6) | -0.07 (-0.2, 0.1)   |
| Myeloma           |                |                       |                |                      |                |                    |                |                     |
| Q1                | 0.3 (0.2, 0.3) | Ref.                  | 0.2 (0.2, 0.3) | Ref.                 | 0.3 (0.2, 0.4) | Ref.               | 0.3 (0.2, 0.4) | Ref.                |
| Q2                | 0.3 (0.2, 0.3) | -0.004 (-0.05, 0.04)  | 0.3 (0.2, 0.3) | 0.006 (-0.04, 0.005) | 0.2 (0.2, 0.3) | -0.09 (-0.2, 0.02) | 0.2 (0.2, 0.3) | -0.09 (-0.2, 0.02)  |
| Q3                | 0.3 (0.2, 0.3) | 0.00001 (-0.05, 0.05) | 0.3 (0.2, 0.3) | 0.01 (-0.04, 0.06)   | 0.2 (0.2, 0.3) | -0.08 (-0.2, 0.05) | 0.2 (0.2, 0.3) | -0.07 (-0.2, 0.05)  |
| Q4                | 0.3 (0.2, 0.3) | 0.001 (-0.06, 0.06)   | 0.3 (0.2, 0.3) | 0.01 (-0.04, 0.07)   | 0.2 (0.2, 0.3) | -0.08 (-0.2, 0.06) | 0.2 (0.1, 0.3) | -0.07 (-0.2, 0.06)  |
| Melanoma skin     |                |                       |                |                      |                |                    |                |                     |
| Q1                | 1.7 (1.5, 1.7) | Ref.                  | 1.5 (1.4, 1.6) | Ref.                 | 1.7 (1.5, 1.8) | Ref.               | 1.5 (1.4, 1.7) | Ref.                |
| Q2                | 2.2 (2.1, 2.3) | 0.6 (0.5, 0.8)        | 2.1 (2.0, 2.2) | 0.6 (0.5, 0.8)       | 2.1 (1.8, 2.3) | 0.4 (0.06, 0.7)    | 2.0 (1.8, 2.2) | 0.5 (0.09, 0.7)     |
| Q3                | 2.4 (2.3, 2.6) | 0.8 (0.6, 1.0)        | 2.3 (2.2, 2.5) | 0.9 (0.7, 1.0)       | 2.2 (2.0, 2.5) | 0.6 (0.2, 0.9)     | 2.1 (1.9, 2.4) | 0.6 (0.2, 1.0)      |
| Q4                | 2.7 (2.5, 2.8) | 1.0 (0.9, 1.3)        | 2.6 (2.4, 2.7) | 1.1 (0.9, 1.3)       | 2.3 (2.0, 2.6) | 0.6 (0.2, 1.1)     | 2.2 (2.0, 2.5) | 0.7 (0.3, 1.1)      |
| Non-melanoma skin |                |                       |                |                      |                |                    |                |                     |
| Q1                | 4.4 (4.2, 4.5) | Ref.                  | 4.0 (3.9, 4.1) | Ref.                 | 4.7 (4.4, 5.0) | Ref.               | 4.4 (4.2, 4.7) | Ref.                |
| Q2                | 5.7 (5.6, 5.9) | 1.4 (1.1, 1.6)        | 5.5 (5.3, 5.6) | 1.4 (1.2, 1.7)       | 5.1 (4.8, 5.4) | 0.4 (-0.1, 0.9)    | 4.9 (4.6, 5.2) | 0.5 (-0.02, 0.9)    |
| Q3                | 6.1 (5.9, 6.3) | 1.7 (1.4, 2.0)        | 5.8 (5.6, 6.0) | 1.8 (1.6, 2.1)       | 5.3 (5.0, 5.7) | 0.6 (0.03, 0.1)    | 5.1 (4.8, 5.4) | 0.7 (0.1, 1.2)      |
| Q4                | 6.7 (6.5, 7.0) | 2.4 (2.1, 2.7)        | 6.5 (6.3, 6.7) | 2.5 (2.2, 2.8)       | 5.3 (4.9, 5.7) | 0.6 (-0.05, 0.1)   | 5.1 (4.7, 5.5) | 0.7 (0.1, 1.2)      |

<sup>a</sup>The flexible parametric models were performed in the full sample, from which the standardised incidences were computed in a random subsample of 10%.

<sup>b</sup>Standardised cumulative incidences as obtained in the main analysis, assuming conditional independence between time to the cancer outcome and the competing event (death from other causes).

<sup>c</sup>Cause-specific standardised cumulative incidence functions, accounting for the competing risk of death from non-cancer causes.

CI = confidence interval. Q = quartile. All estimates are adjusted for age at conscription, year of conscription, body mass index, parental education, and parental income. In both cohorts, the median (range) of  $W_{\max}$  in Q1 was 217 (100-236), in Q2 it was 253 (237-270), in Q3 it was 290 (271-312), in Q4 it was 339 (313-999).

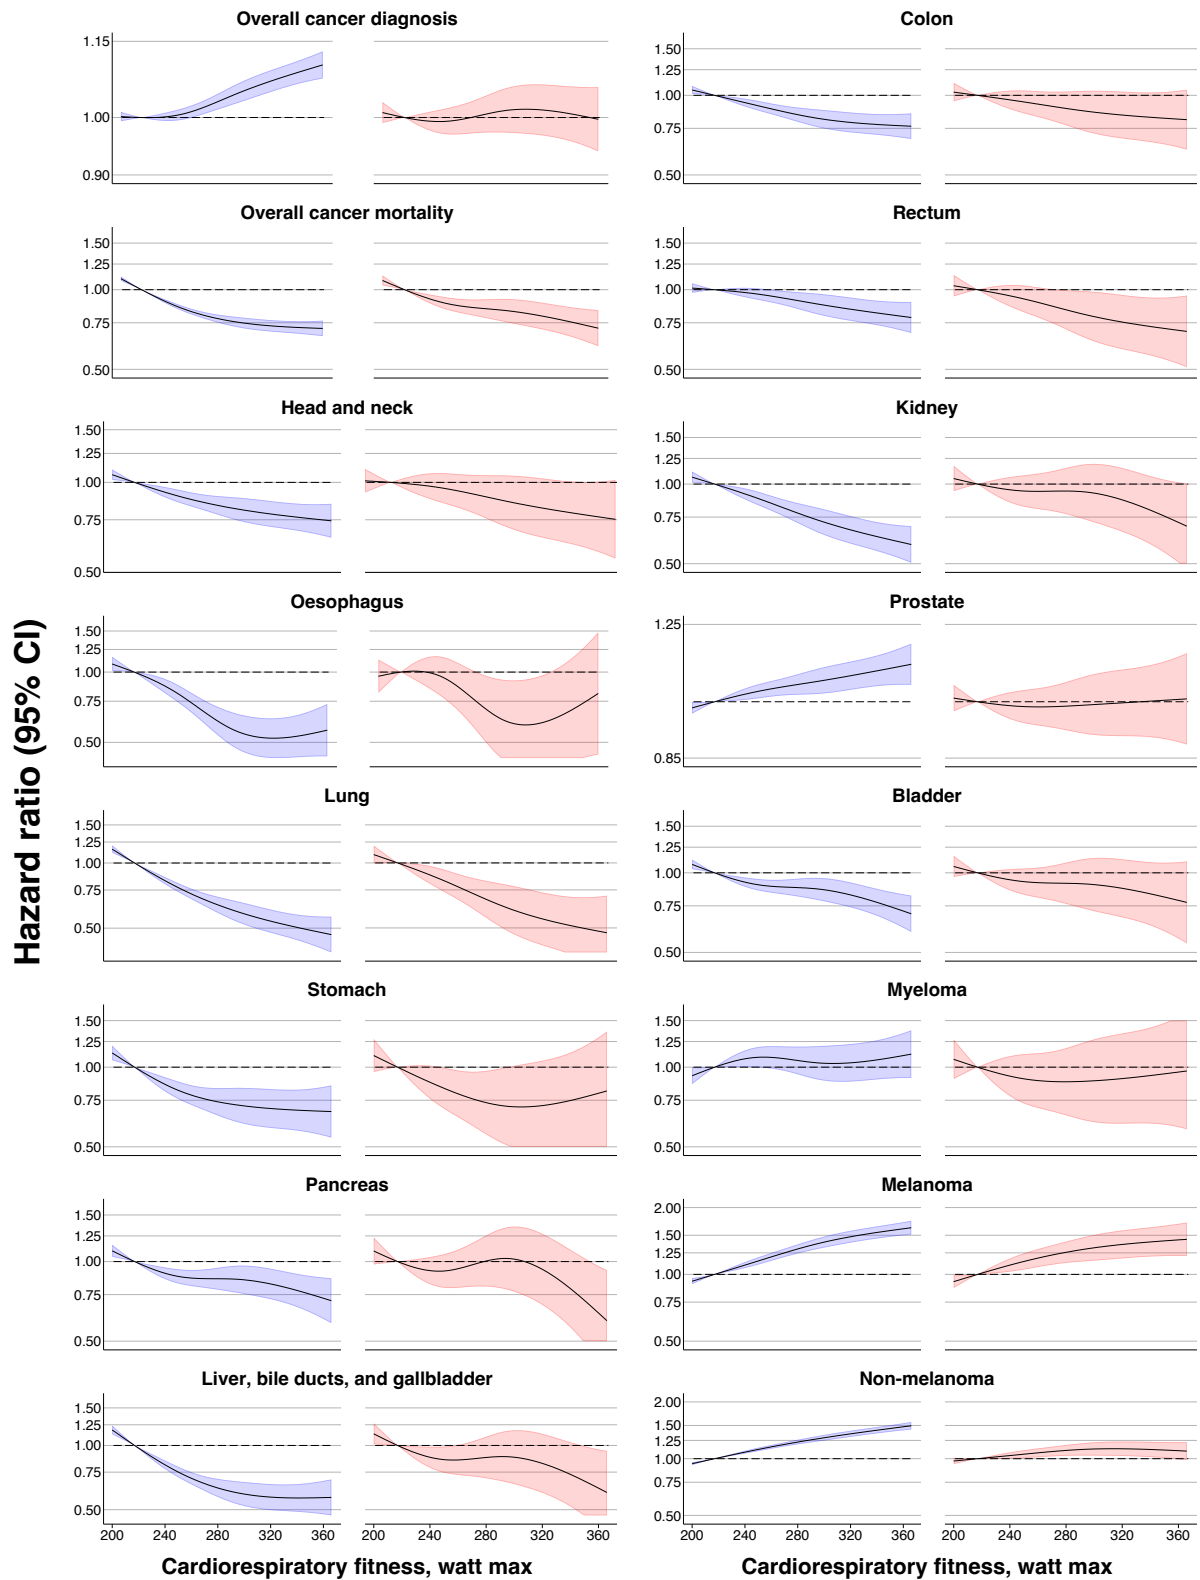

**Supplementary figure 1. Hazard ratios for cancer across restricted cubic splines of cardiorespiratory fitness in cohort (blue) and sibling analysis (red).** Estimates were obtained using flexible parametric survival models, extended to a marginalised between-within model in the sibling cohort, with knots placed at the 5<sup>th</sup>, 35<sup>th</sup>, 65<sup>th</sup>, and 95<sup>th</sup> percentile, and using age as the underlying time scale. The referent was set to the median value of the bottom quartile (217  $W_{max}$ ). The models were adjusted for age at conscription, year of conscription, body mass index, parental education, and parental income. For graphical purposes, the x-axis was limited to span from the 5<sup>th</sup> to the 95<sup>th</sup> percentile of the distribution.



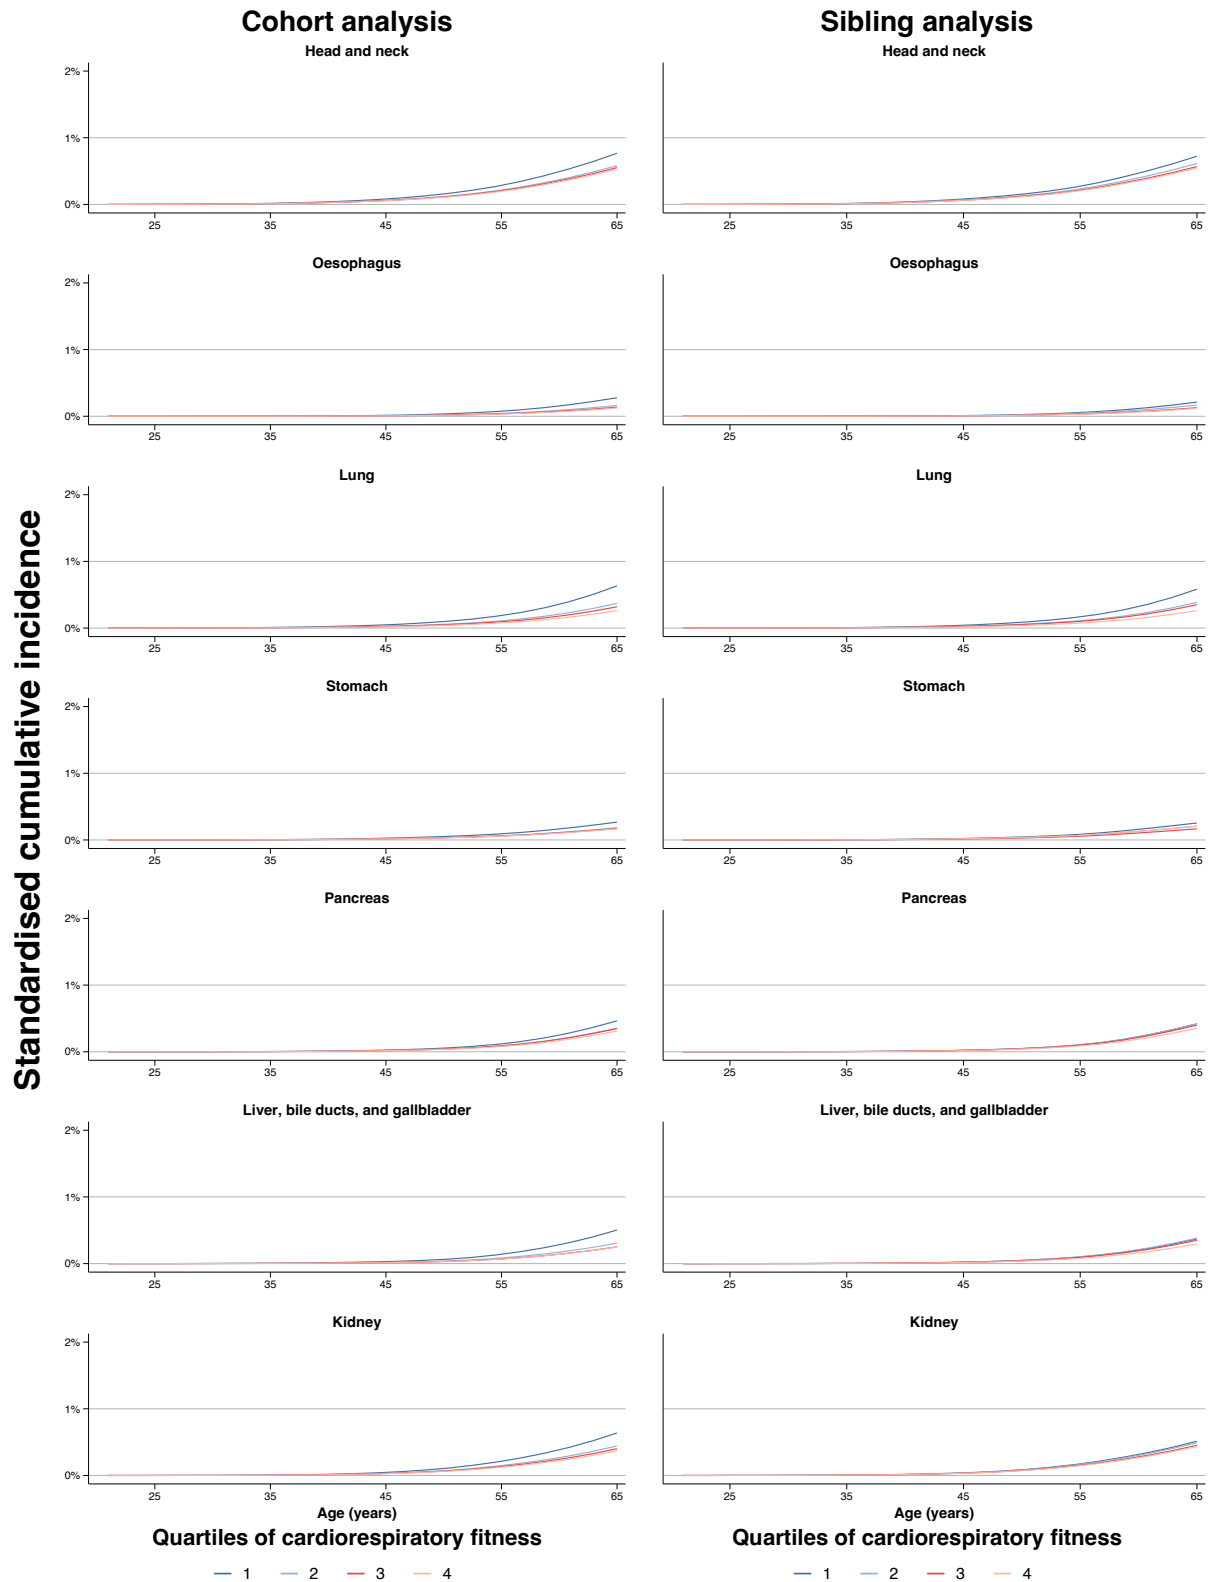

**Supplementary figure 2. Standardised cumulative incidence for site-specific cancer by quartiles of cardiorespiratory fitness in cohort and sibling analysis.** Estimates obtained using flexible parametric survival models, extended to a marginalised between-within model in the sibling cohort, with baseline knots placed at the 5<sup>th</sup>, 27.5<sup>th</sup>, 50<sup>th</sup>, 72.5<sup>th</sup>, and 95<sup>th</sup> percentile of the uncensored log survival times, and using age as the underlying time scale. All models were adjusted for age at conscription, year of conscription, body mass index, parental education, and parental income. Inferential measures for the incidences were omitted for clarity as they are also reflected in supplementary table 3 and 4.

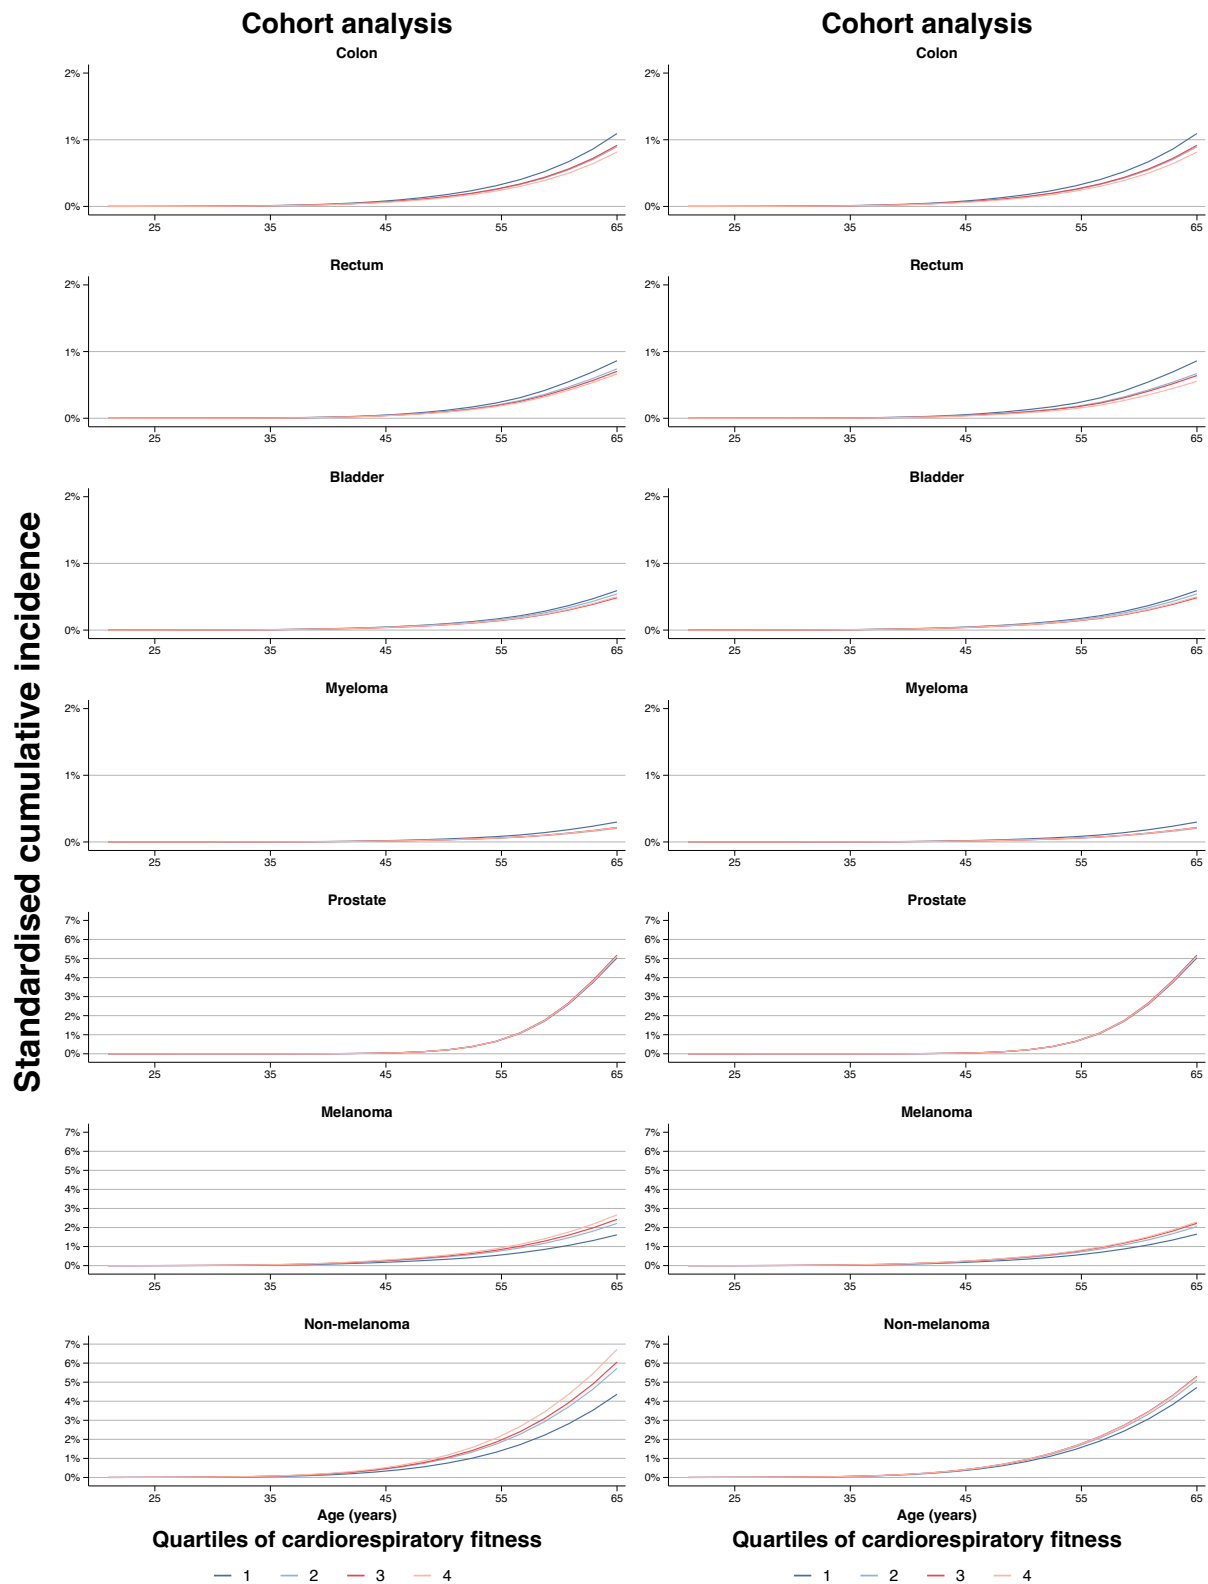

**Supplementary figure 3. Standardised cumulative incidence for site-specific cancer by quartiles of cardiorespiratory fitness in cohort and sibling analysis.** Estimates obtained using flexible parametric survival models, extended to a marginalised between-within model in the sibling cohort, with baseline knots placed at the 5<sup>th</sup>, 27.5<sup>th</sup>, 50<sup>th</sup>, 72.5<sup>th</sup>, and 95<sup>th</sup> percentile of the uncensored log survival times, and using age as the underlying time scale. All models were adjusted for age at conscription, year of conscription, body mass index, parental education, and parental income. Inferential measures for the incidences were omitted for clarity as they are also reflected in supplementary table 3 and 4.
